# Supplementary material for: Sex-dependent control of pheromones on social organization within groups of wild house mice
Source: PubMed Central journal article supplement — Curr Biol. 2023 Apr 24;33(8):1407–1420.e4. doi: 10.1016/j.cub.2023.02.039 (PMC10132349; doi:10.1016/j.cub.2023.02.039), 2023-04-24
Supplement: mmc4.pdf [file mmc4.pdf]

| Figure         | Sex   | N                                                                  | Test used                                                                                                      | Test statistic                                                                                                       | P value                                                                                                                                                                                                                                                                                                                             |
|----------------|-------|--------------------------------------------------------------------|----------------------------------------------------------------------------------------------------------------|----------------------------------------------------------------------------------------------------------------------|-------------------------------------------------------------------------------------------------------------------------------------------------------------------------------------------------------------------------------------------------------------------------------------------------------------------------------------|
| 1C             | M + F | Lab Males=40<br>Lab Females=25<br>Wild Males=45<br>Wild Females=45 | 2-Way ANOVA<br>with Tukey post-<br>hoc                                                                         | $F_{\text{type}(1,151)}=242.7$                                                                                       | $p<0.001$                                                                                                                                                                                                                                                                                                                           |
| 1D             |       |                                                                    |                                                                                                                | $F_{\text{sex} \times \text{type}(1,151)}=21.15$                                                                     | $p<0.001$                                                                                                                                                                                                                                                                                                                           |
| 1E             |       |                                                                    |                                                                                                                | $F_{\text{sex}(1,151)}=59.7$<br>$F_{\text{type}(1,151)}=4.95$                                                        | $p<0.001$<br>$p=0.028$ . $p_{\text{wild males-lab males}}=0.03$                                                                                                                                                                                                                                                                     |
| 2A-B           | M + F | Lab Males=40<br>Lab Females=25                                     | Repeated-<br>measures<br>ANOVA with<br>Tukey post-hoc<br>Repeated-<br>measures<br>ANOVA with<br>Tukey post-hoc | $F_{\text{Rank} \times \text{Day} \times \text{Sex}(5,55)}=5.86$                                                     | $p<0.001$<br>$p_{\text{males}, \alpha\text{-submissives}}=0.0018$ , day 1=1.00, day2=0.013, days3-6<0.001<br>$p_{\text{females}, \alpha\text{-submissives}}=0.152$ , day 1=0.43, day2=0.408, day3=0.711, day 4=0.317,<br>day5=0.352, day6=0.663                                                                                     |
| 2A-B<br>insets |       |                                                                    |                                                                                                                | $F_{\text{Rank}(\text{males},4,28)}=14.0$                                                                            | $p<0.001$<br>$p_{\text{males}, \alpha\text{-}\beta}=0.16$ , $\alpha\text{-}\gamma, \delta, \epsilon<0.001$ , $\beta\text{-}\gamma=0.09$ , $\beta\text{-}\delta=0.045$ , $\beta\text{-}\epsilon=0.002$ , $\gamma\text{-}\delta, \epsilon>0.5$                                                                                        |
|                |       |                                                                    |                                                                                                                | $F_{\text{Rank}(\text{females},4,16)}=1.6$                                                                           | $p=0.233$<br>$p_{\text{females}, \alpha\text{-}\beta}=0.481$ , $\alpha\text{-}\gamma=0.255$ , $\alpha\text{-}\delta=0.507$ , $\alpha\text{-}\epsilon=0.244$ , $\beta\text{-}\gamma, \delta, \epsilon>0.9$                                                                                                                           |
| 2C-D           | M + F | Wild Males=45<br>Wild Females=45                                   | Repeated-<br>measures<br>ANOVA with<br>Tukey post-hoc                                                          | $F_{\text{Rank} \times \text{Day}(5,80)}=3.83$                                                                       | $p=0.004$<br>$p_{\text{males}, \alpha\text{-submissives}}<0.001$ , days 1-6<0.001<br>$p_{\text{females}, \alpha\text{-submissives}}=0.0034$ , day 1=0.99, day2=0.249, day3=0.076, days 4-<br>6<0.001                                                                                                                                |
| 2C-D<br>insets |       |                                                                    |                                                                                                                | $F_{\text{Rank}(\text{males},4,32)}=13.1$                                                                            | $p<0.001$<br>$p_{\text{males}, \alpha\text{-}\beta}=0.002$ , $\alpha\text{-}\gamma, \delta, \epsilon<0.001$ , $\beta\text{-}\gamma=0.542$ , $\beta\text{-}\delta=0.609$ , $\beta\text{-}\epsilon=0.211$ , $\gamma\text{-}\delta, \epsilon>0.9$                                                                                      |
|                |       |                                                                    |                                                                                                                | $F_{\text{Rank}(\text{females},4,32)}=14.9$                                                                          | $p<0.001$<br>$p_{\text{females}, \alpha\text{-}\beta}=0.007$ , $\alpha\text{-}\gamma=0.003$ , $\alpha\text{-}\delta, \epsilon<0.001$ , $\beta\text{-}\gamma=0.99$ , $\beta\text{-}\delta=0.328$ , $\beta\text{-}\epsilon=0.007$ ,<br>$\gamma\text{-}\delta=0.499$ , $\gamma\text{-}\epsilon=0.016$ , $\delta\text{-}\epsilon=0.418$ |
| 2F             | M + F | Lab Males=40<br>Lab Females=25<br>Wild Males=45<br>Wild Females=45 | Mann-Whitney<br>(M vs. F)                                                                                      | $U_{\text{Lab}}=4.0$                                                                                                 | $p=0.019$                                                                                                                                                                                                                                                                                                                           |
| 2G             |       |                                                                    |                                                                                                                | $U_{\text{Wild}}=29.5$                                                                                               | $p=0.34$                                                                                                                                                                                                                                                                                                                            |
| 2H             |       |                                                                    |                                                                                                                | $U_{\text{Lab}}=4.0$<br>$U_{\text{Wild}}=22.0$                                                                       | $p=0.019$<br>$p=0.113$                                                                                                                                                                                                                                                                                                              |
| 2I             |       |                                                                    |                                                                                                                | $U_{\text{Lab}}=0$<br>$U_{\text{Wild}}=20$                                                                           | $p=0.002$<br>$p=0.077$                                                                                                                                                                                                                                                                                                              |
| 3D             | M + F | Wild Males=45<br>Wild Females=45                                   | Mann-Whitney<br>(with Benjamini-<br>Hochberg<br>correction)                                                    | $U_{\text{Archetype.A}}=0$<br>$U_{\text{Archetype.B}}=3$<br>$U_{\text{Archetype.I}}=0$<br>$U_{\text{Archetype.P}}=0$ | $p=0.037$<br>$p=0.055$<br>$p=0.037$<br>$p=0.023$                                                                                                                                                                                                                                                                                    |
| 3E             | M + F | Wild Males=45<br>Wild Females=45                                   | Kolmogorov-<br>Smirnov                                                                                         | $D_{\text{Archetype.A}}=0.333$<br>$D_{\text{Archetype.B}}=0.311$<br>$D_{\text{Archetype.P}}=0.511$                   | $p=0.013$<br>$p=0.025$<br>$p<0.001$                                                                                                                                                                                                                                                                                                 |

|             |       |                                                                                                                |                                                   |                                                                                                                                                                                                                                                                                                                                                                 |                                                                                                                                                                                                                                                                                        |
|-------------|-------|----------------------------------------------------------------------------------------------------------------|---------------------------------------------------|-----------------------------------------------------------------------------------------------------------------------------------------------------------------------------------------------------------------------------------------------------------------------------------------------------------------------------------------------------------------|----------------------------------------------------------------------------------------------------------------------------------------------------------------------------------------------------------------------------------------------------------------------------------------|
| 3F          | M + F | Wild Males=45<br>Wild Females=45                                                                               | Repeated randomized shuffling                     |                                                                                                                                                                                                                                                                                                                                                                 | $p_{\text{Archetype.A}}=0.0036$<br>$p_{\text{Archetype.B}}=0.078$<br>$p_{\text{Archetype.I}}=0.453$<br>$p_{\text{Archetype.P}}=0.423$                                                                                                                                                  |
| 3G          | M + F | Wild Males=45<br>Wild Females=45                                                                               | Spearman correlation                              | $t_{(N-2)}=-2.65$                                                                                                                                                                                                                                                                                                                                               | $p=0.0096$                                                                                                                                                                                                                                                                             |
| 3H          | M + F | Wild Males=45<br>Wild Females=45                                                                               | Spearman correlation                              | $t_{(N-2)}=2.19$                                                                                                                                                                                                                                                                                                                                                | $p=0.031$                                                                                                                                                                                                                                                                              |
| 4A-B        | M + F | Wild TrpC2 <sup>-/-</sup> Males=15<br>Wild TrpC2 <sup>-/-</sup> Females=30                                     | Wilcoxon signed-rank                              | $T_{\text{Social}}=0$<br>$T_{\text{Individual}}=20$                                                                                                                                                                                                                                                                                                             | $p=0.003$<br>$p=0.013$                                                                                                                                                                                                                                                                 |
| 4C-D        | M + F | Wild TrpC2 <sup>-/-</sup> Males=15<br>Wild TrpC2 <sup>-/-</sup> Females=30                                     | Repeated-measures ANOVA with Tukey post-hoc       | $F_{\text{Rank (1,7)}}=36.69$                                                                                                                                                                                                                                                                                                                                   | $p<0.001$<br>$p_{\text{males, } \alpha\text{-submissives}}=0.015, \text{ day 1}=0.003, \text{ days 2-6}<0.001$<br>$p_{\text{females, } \alpha\text{-submissives}}=0.013, \text{ day 1}=0.007, \text{ days 2-6}<0.001$                                                                  |
| 4C-D insets |       |                                                                                                                |                                                   | $F_{\text{Rank (males,4,8)}}=16.6$                                                                                                                                                                                                                                                                                                                              | $p<0.001$<br>$p_{\text{males, } \alpha\text{-}\beta}=0.013, \alpha\text{-}\gamma=0.003, \alpha\text{-}\delta=0.0013, \alpha\text{-}\epsilon<0.001, \beta\text{-}\gamma=0.759, \beta\text{-}\delta=0.288, \beta\text{-}\epsilon=0.124, \gamma\text{-}\delta\text{-}\epsilon>0.5$        |
|             |       |                                                                                                                |                                                   | $F_{\text{Rank (females,4,20)}}=15.14$                                                                                                                                                                                                                                                                                                                          | $p<0.001$<br>$p_{\text{females, } \alpha\text{-}\beta}=0.086, \alpha\text{-}\gamma, \delta, \epsilon<0.001, \beta\text{-}\gamma=0.159, \beta\text{-}\delta=0.094, \beta\text{-}\epsilon=0.003, \gamma\text{-}\delta=0.998, \gamma\text{-}\epsilon=0.315, \delta\text{-}\epsilon=0.464$ |
| 4E          | M + F | Wild Males=45<br>Wild Females=45<br>Wild TrpC2 <sup>-/-</sup> Males=15<br>Wild TrpC2 <sup>-/-</sup> Females=30 |                                                   | <u>Chasing events:</u><br>$U_{\text{Females}}=3$<br>$U_{\text{Males}}=8$<br><u>Despotism <math>\alpha</math>:</u><br>$U_{\text{Females}}=7$<br>$U_{\text{Males}}=10$<br><u>Stability <math>\alpha</math>:</u><br>$U_{\text{Females}}=8$<br>$U_{\text{Males}}=10.5$<br><u>Stability <math>\epsilon</math>:</u><br>$U_{\text{Females}}=9$<br>$U_{\text{Males}}=9$ | $p=0.006$<br>$p=0.36$<br>$p=0.022$<br>$p=0.579$<br>$p=0.029$<br>$p=0.644$<br>$p=0.039$<br>$p=0.46$                                                                                                                                                                                     |
| 5B          |       |                                                                                                                | Mann-Whitney (with Benjamini-Hochberg correction) | $U_{\text{Archetype.AP}}=0$<br>$U_{\text{Archetype.ST}}=1$<br>$U_{\text{Archetype.SE}}=0$                                                                                                                                                                                                                                                                       | $p=0.008$<br>$p=0.016$<br>$p=0.008$                                                                                                                                                                                                                                                    |
| 5C          |       |                                                                                                                | Kolmogorov-Smirnov                                | $D_{\text{Archetype.AP}}=0.867$<br>$D_{\text{Archetype.ST}}=0.8$<br>$D_{\text{Archetype.SE}}=0.267$                                                                                                                                                                                                                                                             | $p<0.001$<br>$p<0.001$<br>$p=0.459$                                                                                                                                                                                                                                                    |

|                     |       |                                                                                                                                                                                                                              |                                                            |                                                                                                                                                                 |                                                                                                                                                                                                                                                                                                                                                                                                                                                             |
|---------------------|-------|------------------------------------------------------------------------------------------------------------------------------------------------------------------------------------------------------------------------------|------------------------------------------------------------|-----------------------------------------------------------------------------------------------------------------------------------------------------------------|-------------------------------------------------------------------------------------------------------------------------------------------------------------------------------------------------------------------------------------------------------------------------------------------------------------------------------------------------------------------------------------------------------------------------------------------------------------|
| S1E                 | M + F | Lab Males=40<br>Lab Females=25                                                                                                                                                                                               | Friedman's ANOVA with post-hoc pairwise signed-ranks tests | $\chi^2_{\text{males}}=20.9$<br>$\chi^2_{\text{females}}=6.4$                                                                                                   | $p<0.001$<br>$p_{\text{males}, \alpha-\beta, \gamma, \delta, \epsilon}=0.014, \beta-\gamma=0.042, \beta-\delta=0.08, \beta-\epsilon=0.021, \gamma-\delta=0.944, \gamma, \delta-\epsilon=0.142$<br>$p=0.17$<br>$p_{\text{females}, \alpha-\beta}=0.06, \alpha-\gamma, \delta, \epsilon=0.11, \beta-\gamma=1, \beta-\delta, \epsilon=0.59, \gamma-\delta=0.59, \gamma-\epsilon=1, \delta-\epsilon=0.28$                                                       |
| S1F                 |       | Wild Males=45<br>Wild Females=45                                                                                                                                                                                             |                                                            | $\chi^2_{\text{males}}=26.04$<br>$\chi^2_{\text{females}}=25.9$                                                                                                 | $p<0.001$<br>$p_{\text{males}, \alpha-\beta}=0.018, \alpha-\gamma, \delta, \epsilon=0.009, \beta-\gamma=0.009, \beta-\delta=0.024, \beta-\epsilon=0.013, \gamma-\delta=0.058, \gamma-\epsilon=0.044, \delta-\epsilon=0.722$<br>$p<0.001$<br>$p_{\text{females}, \alpha-\beta}=0.04, \alpha-\gamma, \delta, \epsilon=0.009, \beta-\gamma=0.407, \beta-\delta=0.024, \beta-\epsilon=0.009, \gamma-\delta=0.018, \gamma-\epsilon=0.013, \delta-\epsilon=0.058$ |
| S3D                 | M + F | Lab TrpC2 <sup>-/-</sup> Males=40<br>Lab TrpC2 <sup>-/-</sup> Females=20                                                                                                                                                     | Repeated-measures ANOVA with Tukey post-hoc                | $F_{\text{Rank} \times \text{Day} \times \text{Sex}(5,105)}=7.8$                                                                                                | $p<0.001$<br>$p_{\text{males}}=0.001$<br>$p_{\text{females}}=0.057$                                                                                                                                                                                                                                                                                                                                                                                         |
| S3E-F               | M + F | Lab Males=40<br>Lab Females=25<br>Wild Males=45<br>Wild Females=45<br>Lab TrpC2 <sup>-/-</sup> Males=40<br>Lab TrpC2 <sup>-/-</sup> Females=20<br>Wild TrpC2 <sup>-/-</sup> Males=15<br>Wild TrpC2 <sup>-/-</sup> Females=30 | Repeated-measures ANOVA with Tukey post-hoc                | $F_{\text{genotype} \times \text{day} \times \text{sex}(1,1260)}=19.94$<br>$F_{\text{genotype} \times \text{day} \times \text{type}(1,1260)}=7.83$              | $P<0.001$<br>$p<0.001$                                                                                                                                                                                                                                                                                                                                                                                                                                      |
| S3G-H               | M + F | Lab Males=40<br>Lab Females=25<br>Wild Males=45<br>Wild Females=45<br>Lab TrpC2 <sup>-/-</sup> Males=40<br>Lab TrpC2 <sup>-/-</sup> Females=20<br>Wild TrpC2 <sup>-/-</sup> Males=15<br>Wild TrpC2 <sup>-/-</sup> Females=30 | Repeated-measures ANOVA with Tukey post-hoc                | $F_{\text{genotype} \times \text{day} \times \text{sex}(1,1260)}=11.45$<br>$F_{\text{genotype} \times \text{day} \times \text{type}(1,1260)}=2.89$              | $P<0.001$<br>$P=0.013$                                                                                                                                                                                                                                                                                                                                                                                                                                      |
| S4A <sub>up</sub>   | M + F | Lab Males=7<br>Lab Females=11<br>Wild Males=15<br>Wild Females=11                                                                                                                                                            | 2-Way ANOVA with Tukey post-hoc                            | $F_{\text{type}(\text{Total distance}, 1,40)}=14.54$<br>$F_{\text{type}(\text{center visits}, 1,40)}=48.29$<br>$F_{\text{type}(\text{Rearing time}, 1,40)}=7.5$ | $p<0.001$<br>$p<0.001$<br>$p=0.009$                                                                                                                                                                                                                                                                                                                                                                                                                         |
| S4A <sub>down</sub> | F     | Lab Females=11<br>Wild Females=11<br>Lab TrpC2 <sup>-/-</sup> Females=11                                                                                                                                                     | 2-Way ANOVA with Tukey post-hoc                            | $F_{\text{type}(\text{Total distance}, 1,38)}=28.56$                                                                                                            | $p<0.001$<br>$p<0.001$                                                                                                                                                                                                                                                                                                                                                                                                                                      |

|     |       |                                                                                                                                                                                                                              |                                    |                                                                                              |                    |
|-----|-------|------------------------------------------------------------------------------------------------------------------------------------------------------------------------------------------------------------------------------|------------------------------------|----------------------------------------------------------------------------------------------|--------------------|
|     |       | Wild TrpC2 <sup>-/-</sup> Females=9                                                                                                                                                                                          |                                    | F <sub>type(center visits, 1,38)</sub> =65.57<br>F <sub>type(Rearing time, 1,38)</sub> =34.7 | p<0.001            |
| S4B | M + F | Lab Males=40<br>Lab Females=25<br>Wild Males=45<br>Wild Females=45<br>Lab TrpC2 <sup>-/-</sup> Males=40<br>Lab TrpC2 <sup>-/-</sup> Females=20<br>Wild TrpC2 <sup>-/-</sup> Males=15<br>Wild TrpC2 <sup>-/-</sup> Females=30 | 2-Way ANOVA<br>with Tukey post-hoc | F <sub>type(Males, 1,136)</sub> =48.33<br>F <sub>type(Females, 1,116)</sub> =14.29           | p<0.001<br>p<0.001 |
